# Supplementary material
Source: Research Square preprint supplement (doi:10.21203/rs.3.rs-9301843/v1)
Supplement: Supplementary file 1 [file 4a4918c84765d88f9df941c9.docx]

**Additional files:**

**Additional file 1:** Interview guide

**Acronym list:**

**BCIO –** Behaviour Change Intervention Ontology
