# Supplementary material
Source: Research Square preprint supplement (doi:10.21203/rs.3.rs-9301843/v1)
Supplement: Supplementary file 2 [file f54b2b27d28da602d90e69b1.docx]

**Additional file 1: Interview guide**

*Whilst we will address the questions below during the interview, the qualitative work will remain flexible, allowing participants to guide the conversations and present what is important to them. It is best practice during qualitative interview projects to iteratively develop topics and questions as new ideas are identified from early data collection. Therefore, following best practice, we may add new topics as the interviews progress and data collection continues.*

*The key focus of these interviews will be researchers experience of adapting a complex intervention for remote delivery within a trial during the COVID-19 pandemic.*

**Introduction:**

Thank you very much for taking the time to talk to me today. Have you had sufficient time to read and understand the information that was sent to you?

The aim of this interview is to explore your experience of being involved in the trial of a complex intervention that had to be adapted for remote delivery during the COVID-19 pandemic. I would really like to hear about your experiences of this process, and any insights you have. You have been invited to participate in this research because you have been involved a trial where the intervention being tested had to be adapted from in person to remote delivery, as a result of the COVID-19 pandemic.

If this is not the case, please let me know at this point. [confirmation of eligibility]

Before we start, do you have any questions you would like to ask about this research?

The first part of the interview will involve some short ‘background’ questions. Then I’m going to ask questions around the process of adaptation for remote intervention delivery. I understand different roles in a trial are involved more/less at different points of intervention delivery, so don’t worry if you can’t answer some questions. Any thoughts, or reflections you have are relevant.

The interview should last no longer than one hour. To maintain anonymity, once I start recording, I will refer to you only by your study ID number.

Are you happy to confirm that you understand what the study involves, are happy to participate and are happy for this interview to be audio recorded?

[Participant to confirm. If not, do not proceed]

[Start recording]

I would first like to collect some brief ‘background’ information from you about the trial you were working on, to help me contextualise our discussion!

**Background:**

- Could you describe the intervention you were working on that was meant to be delivered face-to-face during the COVID-19 pandemic?
  - What was meant to be delivered/ what was it meant to look like?
  - What was the intervention testing?
  - Who was the patient population it was being testing on?
  - What was the comparator?
  - What was the outcome measure of the trial?
  - Was the intervention group-based/individual?
- What role did you have while working on this trial?
  - What did your role involve?
- At what point during the trial, did COVID-19 impact intervention delivery?
  - At this point was the intervention already being delivered?
  - Did you have to immediately stop intervention delivery? If no/yes - why?
  - Were there any plans in place for remote delivery?

**Adaptation:**

**Can you tell me about how you and the trial team went about adapting X intervention (name the intervention they described previously) from face-to-face to remote delivery?**

**Prompts:**

- What did you have to do? **(what did you use to remotely deliver the intervention?)**
- What did you have to think about when making these changes? / What factors influenced your decision making?
- What made this process harder/easier?
- Did you use anything to inform the process you took (e.g. framework/ guidance?)
- Who was involved in this process?
  - Did you and the team consult with anyone (e.g. trial steering committee or funder)
  - Did you involve a PPI group?

**Did any changes have to be made to the intervention being tested to make it more suitable for remote delivery?**

- Did the content of what was being delivered change? How? Why?
- How about for the comparator? Did any changes have to be made?
- Did you do anything to keep track of these changes?
- How did you have to report these changes to the original protocol?

**Is this how you and the trial team would normally go about the process of adapting an intervention?**

- If not, why?
- What would you typically do?
- Is there anything you would have liked to have done but couldn’t? Why?

**Did anything unexpected occur in the trial as a result of adaptations to intervention delivery?**

**Remote delivery:**

We’ve covered the steps you went through to adapt the intervention for remote delivery, now I want to explore how you operationalised the remote delivery of the intervention that was being tested.

**What did you use to remotely deliver the intervention within the trial?**

- - E.g. using Zoom/ Team/telephone?
  - Why did you choose this/these mode(s) of delivery?
  - Did you have to consult anyone about using this mode of delivery? (e.g. the university?)
  - Did you have to tailor the mode of delivery to patient’s needs?

**Can you tell me about any challenges you and the trial team encountered as a result of delivering the intervention in this way?**

- - E.g. Resources for set up/ cost of additional training/ back up plan for tech failures.
  - How did participants respond to the changes? Was additional support required?
  - How did you try and address these issues? Whose decision was it?

**We’re spoken about challenges of delivering the intervention in this way, but were there any positives you found from delivering the intervention in this way?**

- Money savings?
- Scheduling with intervention deliverers?

**Were there any specific challenges and considerations you and the trial team had to make when delivering the intervention via (videocall/telephone) as a result of the participants and population involved?**

- - E.g. specific participant characteristics that made remote delivery harder/easier
  - Risk of falling?
  - Vulnerable?
  - Who they live with?
  - How did you try and address these challenges?

**Did you have plans to measure intervention fidelity of the original intervention?** (If yes proceed to next question)

**How did remote delivery (via telephone/videocall) impact how intervention fidelity was measured?**

- - Was this different than what was planned for the face-to-face intervention?
  - Was it harder/easier to measure fidelity remotely? Why?

**Was there anything in the home setting that made remote intervention delivery more challenging?**

- - Size of space
  - Distractions in the environment
  - How did you address these challenges?

**Was there anything in/about the home setting that made remote intervention delivery easier?**

- Carrying out pre-intervention inventory/checks
- Objects in the environment

**If you had planned to deliver the intervention remotely from the start (outside of a pandemic!), would you have done anything differently?**

- E.g. future proof? Understood the home setting more? In-person set up? Piloting?
- Why?

**Looking forward:**

- - What do you wish you had known?
  - What would have been useful guidance?

**What tips would you give for someone facing similar a situation?**

- E.g. Future proof the trial/ have options for hybrid delivery …

**Concluding comments:**

That brings us to the end of this interview. Is there anything that you would like to mention that I have not covered?

Do you have any comments about the interview content or how it has gone?

**Would you be happy for us to keep your contact details for any future research associated with this PhD, for example to contribute towards a focus group to feedback on any guidance that is developed? Thank you again for your time today. [stop recording]**
